# Supplementary material for: Impact of QTL properties on the accuracy of multi-breed genomic prediction
Source: PubMed Central journal article supplement (PMC4424523; doi:10.1186/s12711-015-0124-6), 2015-05-08
Supplement: 12711_2015_124_MOESM2_ESM.pdf [file 12711_2015_124_MOESM2_ESM.pdf]

## Additional file 2

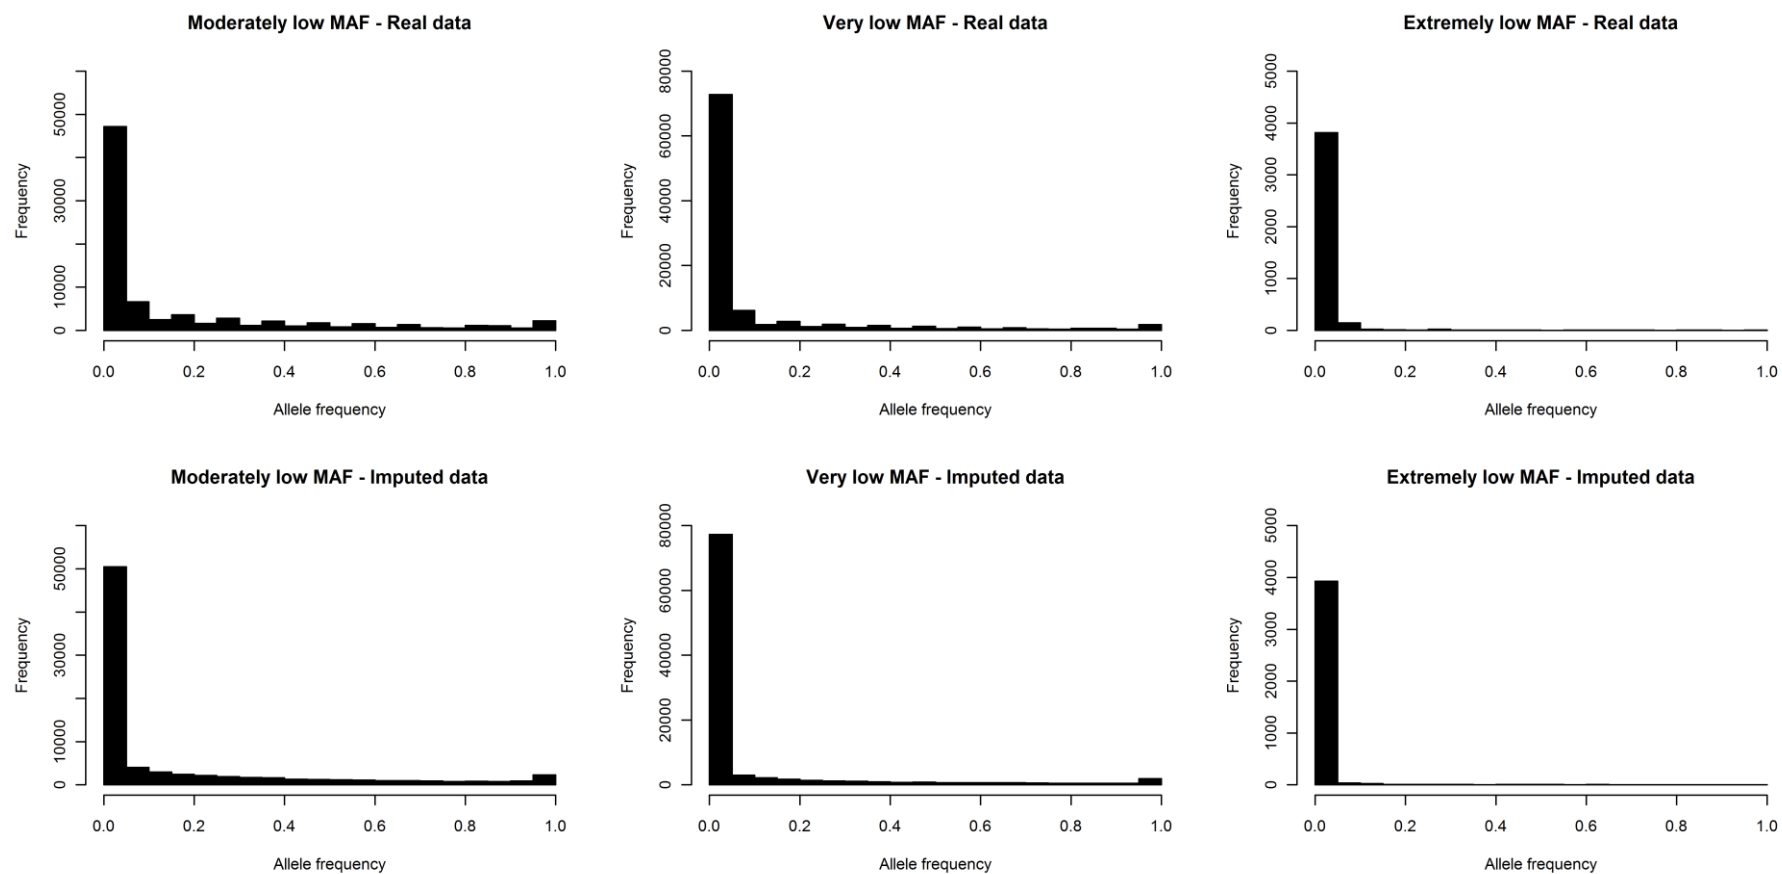

**Figure S2 - Allele frequency distribution of imputed and genotyped variants in Jersey animals.** Distribution of allele frequencies of variants with on average a moderately low minor allele frequency (MAF), very low MAF or extremely low MAF in real data and imputed data for Jersey animals.
