# Supplementary material for: Impact of QTL properties on the accuracy of multi-breed genomic prediction
Source: PubMed Central journal article supplement (PMC4424523; doi:10.1186/s12711-015-0124-6), 2015-05-08
Supplement: 12711_2015_124_MOESM3_ESM.pdf [file 12711_2015_124_MOESM3_ESM.pdf]

## Additional file 3

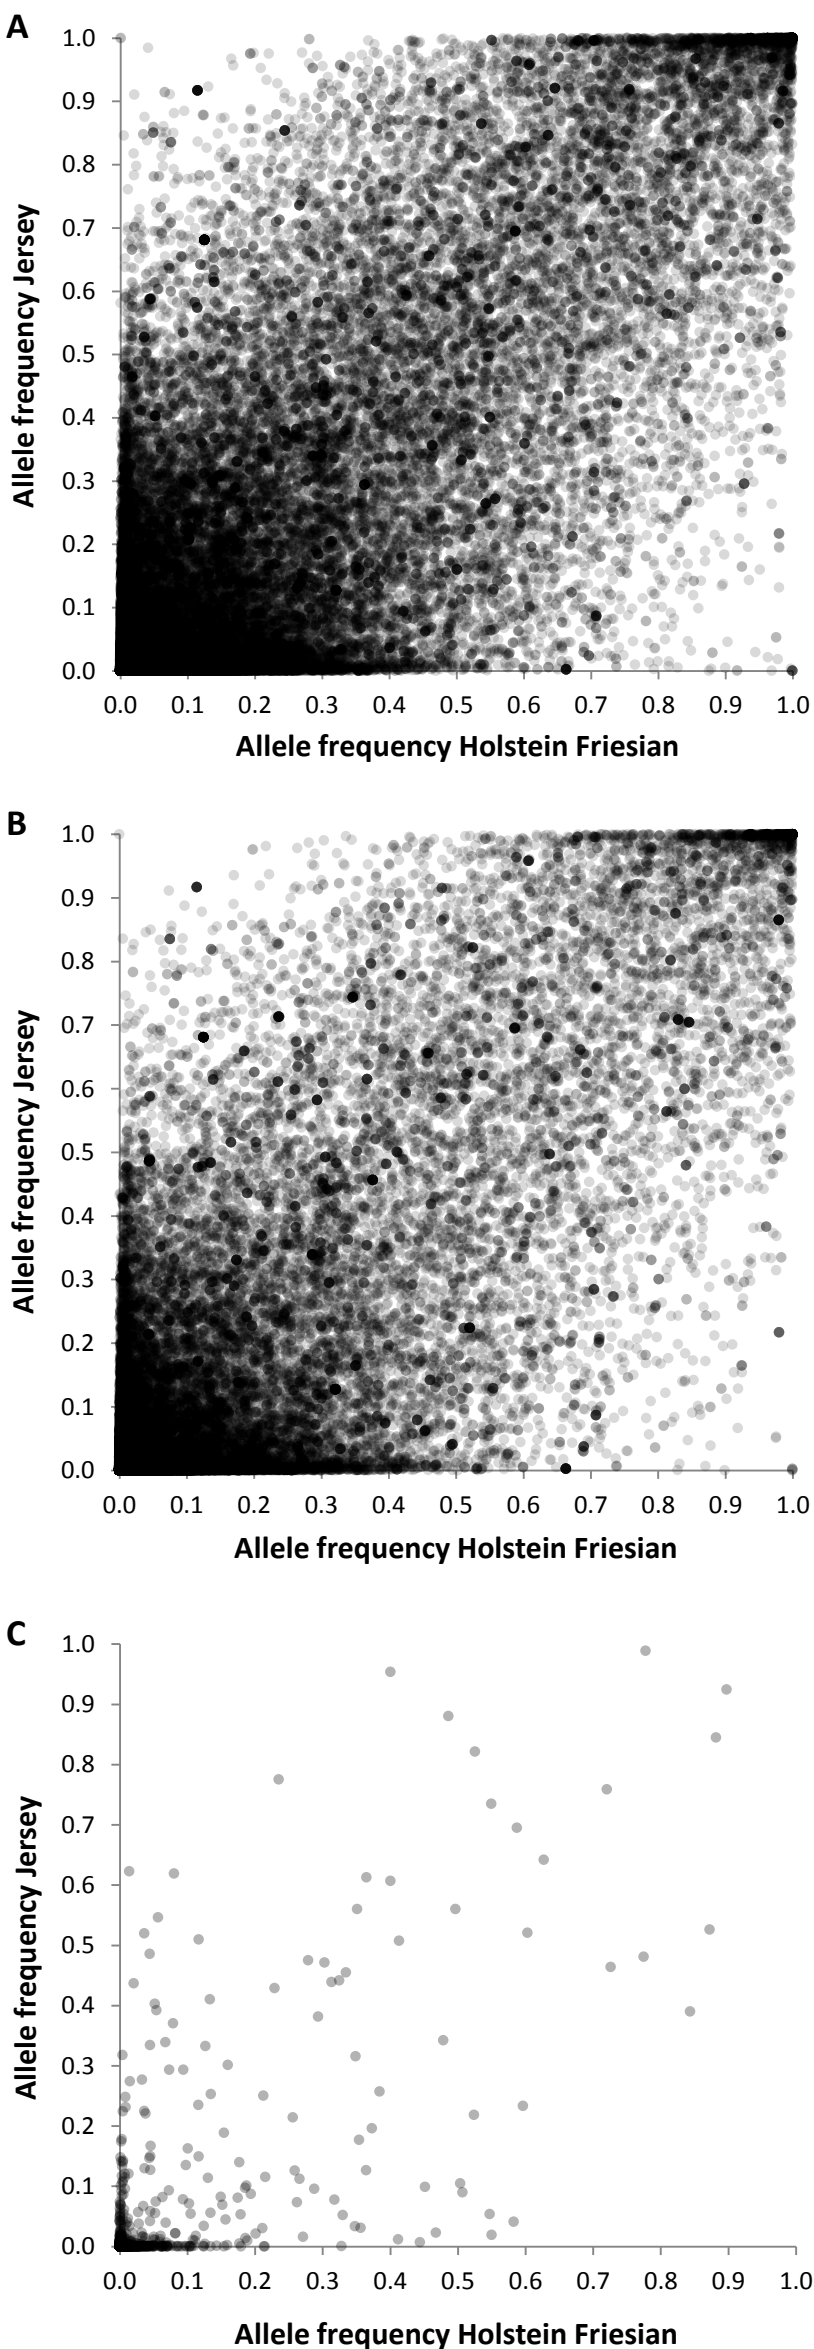

**Figure S3 - Allele frequencies of Holstein Friesian versus Jersey animals.** Patterns of allele frequencies for Holstein Friesian versus Jersey animals. (A) Variants with on average a moderately low minor allele frequency; (B) Variants with on average a very low minor allele frequency; (C) Variants with on average an extremely low minor allele frequency.
