# Supplementary material for: Impact of QTL properties on the accuracy of multi-breed genomic prediction
Source: Springer Nature journal article supplement (doi:10.1186/s12711-015-0124-6), 2015-05-07
Supplement: MOESM1 [file 12711_2015_124_MOESM1_ESM.pdf]

## Additional file 1: Figure S1

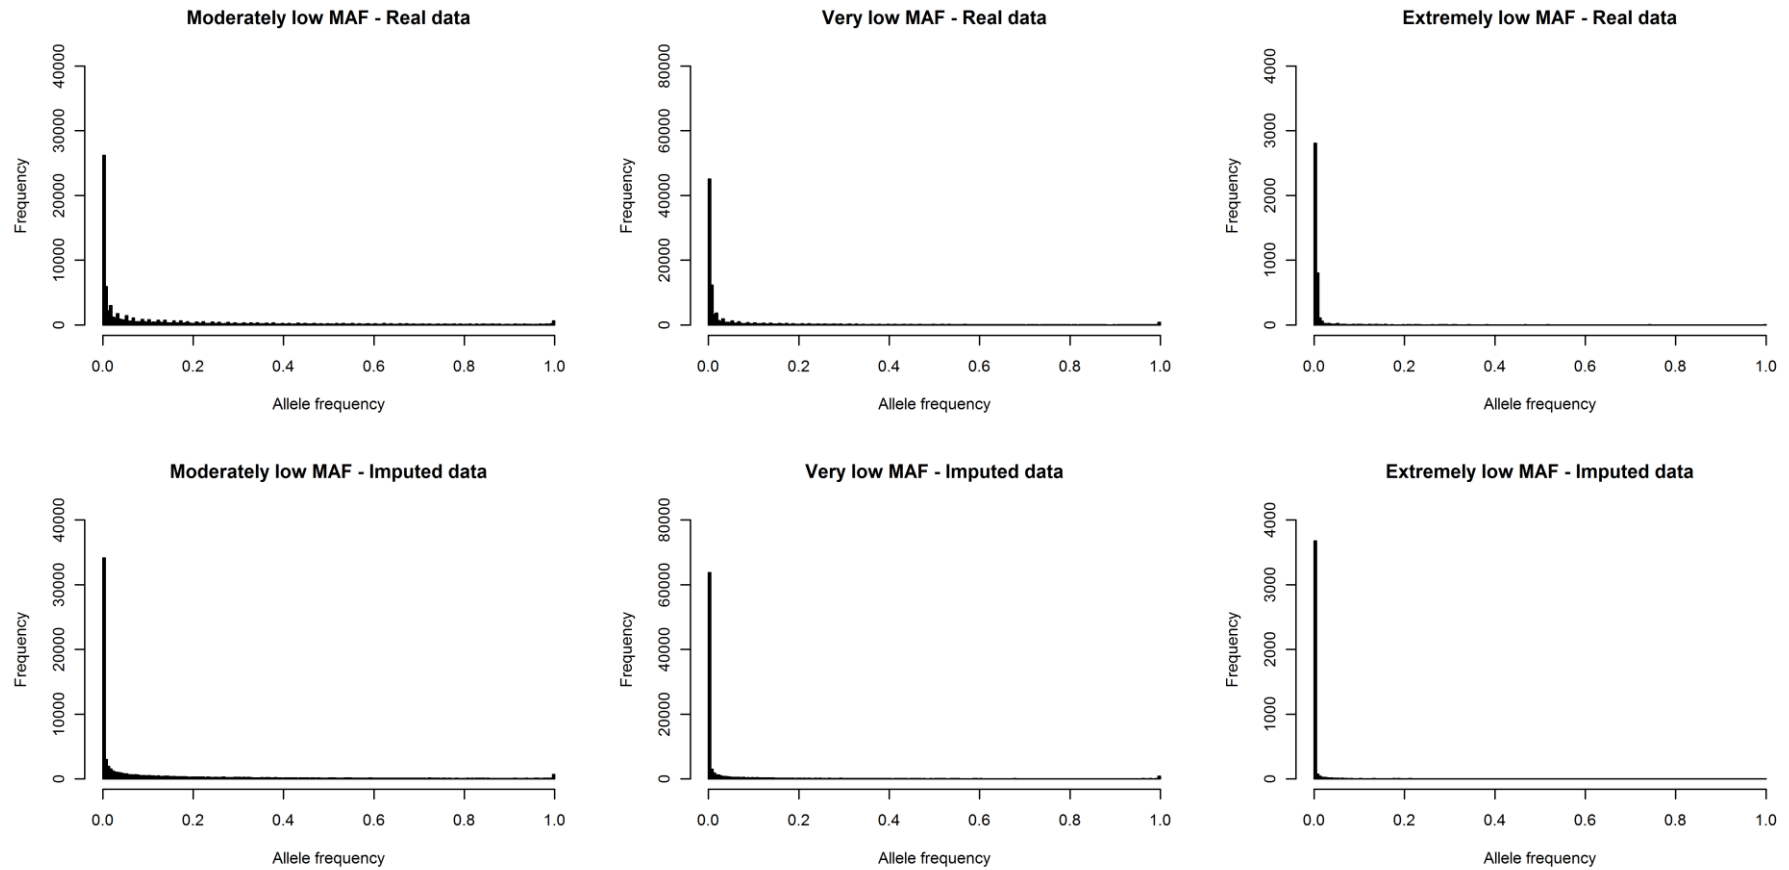

**Figure S1 – Allele frequency distribution of imputed and genotyped variants in Holstein Friesian animals.** Distribution of allele frequencies of variants with on average a moderately low minor allele frequency (MAF), very low MAF or extremely low MAF in real data and imputed data for Holstein Friesian animals.
