# Supplementary material for: Impact of QTL properties on the accuracy of multi-breed genomic prediction
Source: Springer Nature journal article supplement (doi:10.1186/s12711-015-0124-6), 2015-05-07

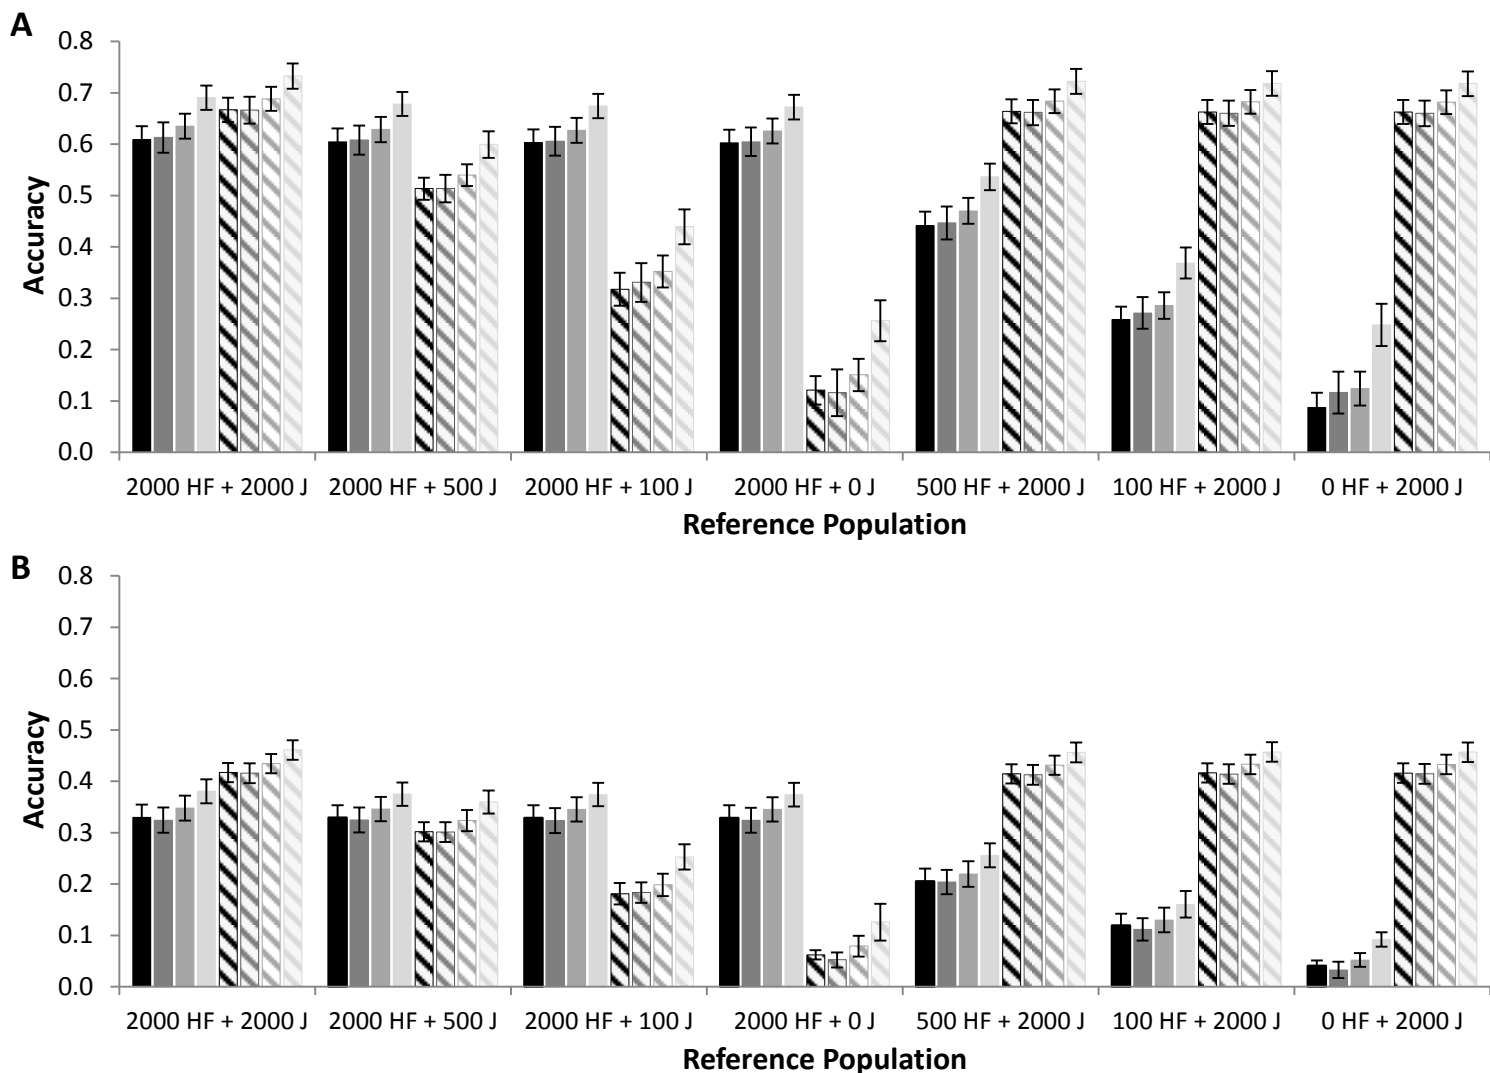

Supplement: MOESM5 [file 12711_2015_124_MOESM5_ESM.pdf]
